# Supplementary material
Source: PubMed Central journal article supplement (PMC8578401)
Supplement: NIHMS1741170-supplement-1.pdf [file NIHMS1741170-supplement-1.pdf]

## SUPPLEMENT

In the main text, we showed the differences between maternal and fetal repertoires in term pregnancies. The numbers of TCR- $\beta$  reads, IgH reads, and isotype reads per sample are recorded in Table S1. The numbers of TCR- $\beta$  clones, IgH clones, and isotype clones per sample are recorded in Table S2. Here, we also examined the differences between maternal blood and cord blood in cases of PPROM (Figure S1). Unlike in the term comparison, here there were significant differences in both the TCR- $\beta$  entropy and the TCR- $\beta$  CDR3 length. Comparing term maternal blood to PPROM maternal blood, we found no differences in the entropy, rate of SHM, or CDR3 length (Figure S2).

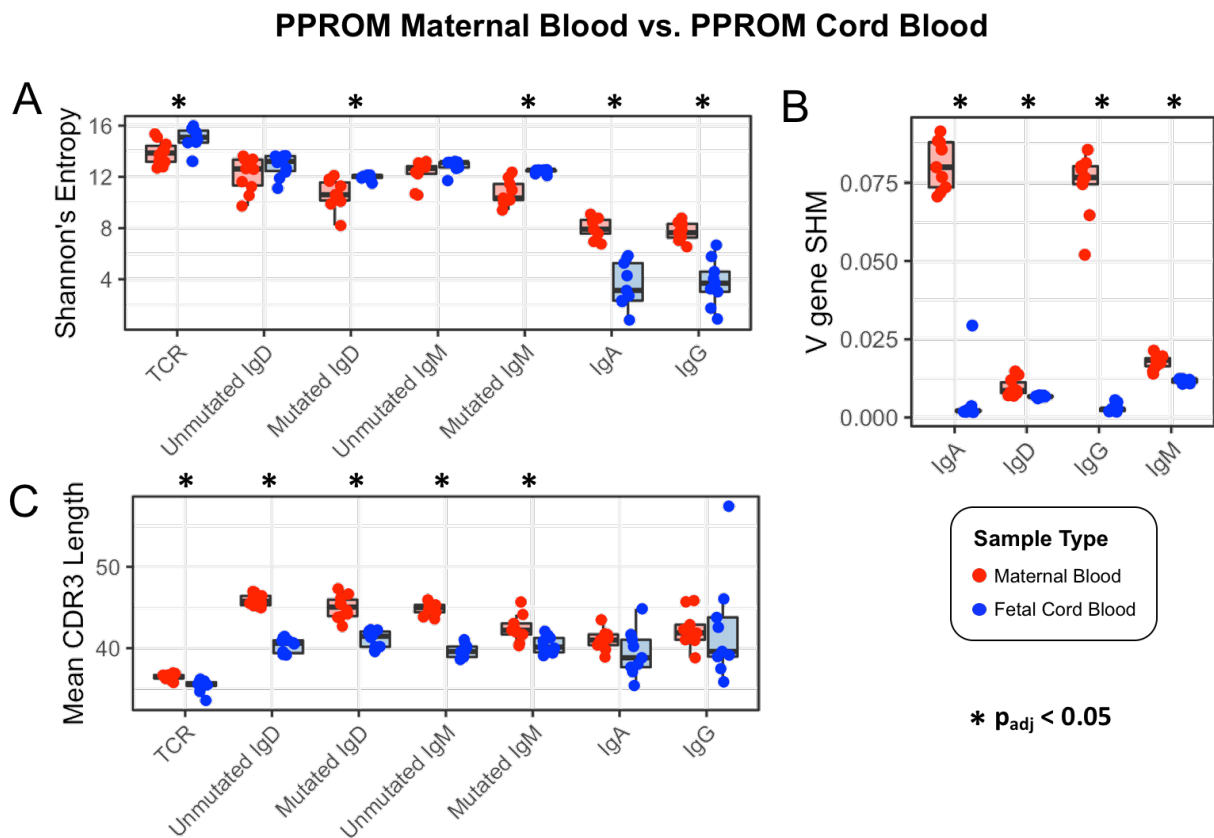

Figure S1. Differences observed in maternal vs. fetal repertoires in PPROM pregnancies were similar to those observed in term pregnancies. (A) Diversity as measured by Shannon's entropy. (B) IgH SHM rates. (C) Comparisons of mean CDR3 lengths.

## Term Maternal Blood vs. PPRM Maternal Blood

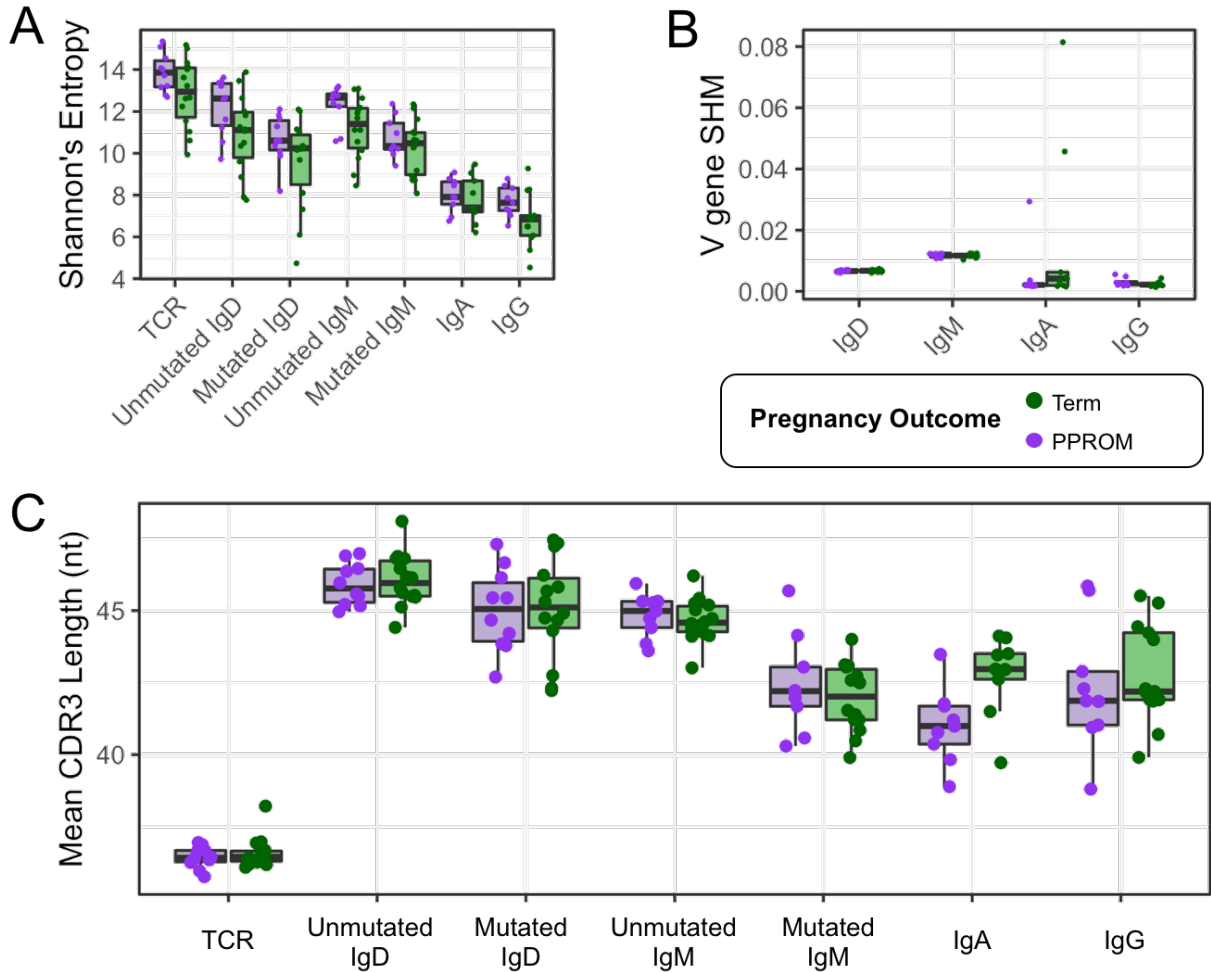

Figure S2. No significant differences observed between term maternal blood and PPRM maternal blood in (A) entropy, (B) rate of SHM, or (C) mean CDR3 length.

### Numbers of Reads Per Sample

| Sample | TCR Reads | IgH Reads | IgA Reads | IgD Reads | IgE Reads | IgG Reads | IgM Reads |
|--------|-----------|-----------|-----------|-----------|-----------|-----------|-----------|
| CB1    | 278710    | 671829    | 207811    | 109933    | 0         | 136874    | 217211    |
| CB2    | 305772    | 584130    | 310       | 228696    | 0         | 140565    | 214559    |
| CB3    | 291554    | 296631    | 30715     | 132401    | 1         | 6232      | 127282    |
| CB4    | 343899    | 303001    | 53955     | 100131    | 2         | 65211     | 83702     |
| CB5    | 269681    | 294630    | 28147     | 112832    | 0         | 48760     | 104891    |
| CB6    | 322505    | 183513    | 11529     | 76997     | 0         | 12278     | 82709     |
| CB7    | 316400    | 248158    | 5339      | 116895    | 1         | 4895      | 121028    |
| CB8    | 314969    | 257538    | 62075     | 105482    | 0         | 24825     | 65156     |
| CB9    | 309230    | 178446    | 895       | 85521     | 4         | 23542     | 68484     |
| CB10   | 338223    | 192056    | 25643     | 70484     | 0         | 28289     | 67640     |
| CB11   | 311616    | 130245    | 600       | 70316     | 0         | 685       | 58644     |
| CB12   | 205164    | 249883    | 2909      | 93256     | 0         | 58311     | 95407     |
| CB13   | 298255    | 248813    | 39211     | 106239    | 0         | 8894      | 94469     |
| CB14   | 293941    | 599138    | 69086     | 163850    | 0         | 201492    | 164710    |
| CB15   | 283287    | 490226    | 21911     | 269468    | 0         | 12393     | 186454    |
| CB16   | 260968    | 430909    | 4         | 219779    | 0         | 8618      | 202508    |
| CB17   | 322249    | 156545    | 5579      | 79128     | 0         | 9678      | 62160     |
| CB18   | 267783    | 531845    | 8418      | 303269    | 0         | 31579     | 188579    |
| CB19   | 263243    | 515866    | 58228     | 163939    | 1         | 143600    | 150098    |
| CB20   | 242930    | 424407    | 13        | 195477    | 2         | 30857     | 198058    |
| CB21   | 317271    | 151596    | 580       | 90454     | 0         | 569       | 59993     |
| CB22   | 287666    | 278122    | 62782     | 108944    | 0         | 24883     | 81513     |
| CB23   | 254497    | 479035    | 6871      | 248191    | 0         | 1649      | 222324    |
| CB24   | 378110    | 226462    | 1268      | 129601    | 0         | 1869      | 93724     |
| MB1    | 287659    | 651959    | 147508    | 166623    | 3846      | 142762    | 191220    |
| MB2    | 273772    | 561018    | 165733    | 25251     | 0         | 183822    | 186212    |
| MB3    | 267802    | 414323    | 73361     | 97276     | 26557     | 97604     | 119525    |
| MB4    | 323088    | 327218    | 31662     | 88130     | 76776     | 64478     | 66172     |
| MB5    | 298787    | 208469    | 5348      | 64532     | 2         | 65000     | 73587     |
| MB6    | 319638    | 315961    | 30335     | 79199     | 91790     | 59748     | 54889     |
| MB7    | 279422    | 362653    | 67829     | 122656    | 22454     | 82332     | 67382     |
| MB8    | 324518    | 309914    | 41424     | 57171     | 123478    | 40245     | 47596     |
| MB9    | 324330    | 122754    | 7632      | 39034     | 6624      | 44531     | 24933     |
| MB10   | 332310    | 124783    | 17520     | 62102     | 0         | 11860     | 33301     |
| MB11   | 327973    | 251685    | 68576     | 79290     | 0         | 70096     | 33723     |
| MB12   | 233037    | 397146    | 53327     | 112610    | 113539    | 74798     | 42872     |
| MB13   | 278333    | 345735    | 53575     | 105959    | 0         | 82502     | 103699    |
| MB14   | 272065    | 702244    | 127735    | 209967    | 5         | 165514    | 199023    |
| MB15   | 307975    | 506516    | 71441     | 198180    | 1         | 185424    | 51470     |
| MB16   | 270195    | 476853    | 114020    | 112124    | 0         | 119567    | 131142    |
| MB17   | 349809    | 266286    | 46489     | 93831     | 0         | 62735     | 63231     |
| MB18   | 290491    | 822102    | 147981    | 223649    | 106252    | 180107    | 164113    |
| MB19   | 298337    | 740912    | 73908     | 153577    | 178967    | 143864    | 190596    |
| MB20   | 243705    | 781622    | 125317    | 261680    | 1         | 197166    | 197458    |
| MB21   | 306050    | 162778    | 15936     | 62148     | 2         | 74919     | 9773      |
| MB22   | 267184    | 384130    | 77731     | 120954    | 25399     | 63404     | 96642     |
| MB23   | 269155    | 642921    | 29597     | 248401    | 1         | 183166    | 181756    |
| MB24   | 307468    | 490760    | 66492     | 113748    | 137419    | 85252     | 87849     |

Table S1. Number of TCR reads, IgH reads (ignoring isotype), and reads per isotype (IgA, IgD, IgE, IgG, IgM (CB = cord blood, MB = maternal blood, paired samples are matched by number).

### Numbers of Unique Clones Per Sample

| Sample | TCR Clones | IgH Clones | IgA Clones | IgD Clones | IgE Clones | IgG Clones | IgM Clones |
|--------|------------|------------|------------|------------|------------|------------|------------|
| CB1    | 18337      | 63019      | 934        | 23848      | 0          | 155        | 38535      |
| CB2    | 23858      | 93942      | 3          | 43862      | 0          | 58         | 51320      |
| CB3    | 76028      | 87031      | 34         | 31934      | 1          | 11         | 59145      |
| CB4    | 98485      | 82282      | 292        | 29602      | 1          | 257        | 54272      |
| CB5    | 105626     | 57141      | 209        | 22093      | 0          | 823        | 42515      |
| CB6    | 104384     | 93075      | 37         | 41248      | 0          | 112        | 56635      |
| CB7    | 53100      | 24874      | 11         | 11074      | 1          | 4          | 16773      |
| CB8    | 85723      | 91382      | 344        | 48339      | 0          | 130        | 48030      |
| CB9    | 21106      | 43302      | 10         | 16680      | 4          | 31         | 28823      |
| CB10   | 56057      | 54071      | 29         | 23617      | 0          | 44         | 32766      |
| CB11   | 31032      | 19732      | 2          | 9444       | 0          | 1          | 11404      |
| CB12   | 40125      | 45253      | 15         | 21389      | 0          | 44         | 26227      |
| CB13   | 28035      | 50102      | 78         | 21841      | 0          | 30         | 30456      |
| CB14   | 62580      | 126063     | 276        | 39445      | 0          | 488        | 87516      |
| CB15   | 19196      | 44129      | 10         | 17186      | 0          | 4          | 27924      |
| CB16   | 23848      | 109078     | 3          | 45687      | 0          | 4          | 65644      |
| CB17   | 51393      | 84710      | 31         | 40876      | 0          | 18         | 48189      |
| CB18   | 15110      | 42172      | 8          | 16539      | 0          | 15         | 25929      |
| CB19   | 35650      | 131554     | 1576       | 60989      | 1          | 987        | 69952      |
| CB20   | 35464      | 82561      | 12         | 36015      | 1          | 17         | 47598      |
| CB21   | 24944      | 23074      | 1          | 13945      | 0          | 3          | 10242      |
| CB22   | 65369      | 88382      | 174        | 44740      | 0          | 88         | 47791      |
| CB23   | 24397      | 29273      | 2          | 9313       | 0          | 5          | 20817      |
| CB24   | 27250      | 46948      | 6          | 24167      | 0          | 6          | 25542      |
| MB1    | 41601      | 69816      | 6553       | 26329      | 4          | 6864       | 31054      |
| MB2    | 69514      | 123857     | 8615       | 20100      | 0          | 5306       | 91785      |
| MB3    | 56076      | 73714      | 3253       | 35676      | 7          | 2898       | 37761      |
| MB4    | 53352      | 59295      | 4426       | 22405      | 44         | 4468       | 30017      |
| MB5    | 95836      | 90024      | 644        | 35622      | 2          | 1537       | 55266      |
| MB6    | 69940      | 51042      | 4013       | 21951      | 16         | 4586       | 23845      |
| MB7    | 86228      | 83319      | 5141       | 35340      | 6          | 4241       | 45123      |
| MB8    | 41322      | 56232      | 4823       | 24499      | 76         | 4196       | 25615      |
| MB9    | 91462      | 51485      | 2678       | 23255      | 4          | 6661       | 19744      |
| MB10   | 54558      | 28664      | 5461       | 10457      | 0          | 1144       | 12410      |
| MB11   | 46177      | 20921      | 1658       | 9524       | 0          | 1669       | 8544       |
| MB12   | 61017      | 47520      | 4858       | 21464      | 30         | 1232       | 21956      |
| MB13   | 22334      | 24972      | 2948       | 6383       | 0          | 1219       | 14942      |
| MB14   | 26351      | 42378      | 2899       | 13586      | 2          | 1659       | 24823      |
| MB15   | 11293      | 14180      | 2260       | 4289       | 1          | 2350       | 5470       |
| MB16   | 11749      | 10261      | 901        | 2697       | 0          | 739        | 6003       |
| MB17   | 21414      | 20005      | 2333       | 7379       | 0          | 1914       | 8895       |
| MB18   | 17226      | 22143      | 2703       | 7629       | 7          | 1673       | 10332      |
| MB19   | 22830      | 43694      | 1338       | 14667      | 12         | 1499       | 27159      |
| MB20   | 5999       | 9745       | 702        | 3155       | 1          | 536        | 5446       |
| MB21   | 18376      | 6829       | 221        | 4043       | 2          | 641        | 1980       |
| MB22   | 39831      | 18270      | 1126       | 11151      | 3          | 784        | 5394       |
| MB23   | 15858      | 31217      | 804        | 13279      | 1          | 1950       | 15429      |
| MB24   | 35931      | 38943      | 4757       | 13017      | 465        | 2470       | 19121      |

Table S2. Number of TCR unique clones, IgH clones (ignoring isotype), and clones per isotype (IgA, IgD, IgE, IgG, IgM (CB = cord blood, MB = maternal blood, paired samples are matched by number).
